# Supplementary material
Source: publisher figshare collection journal article supplement (https://osapublishing.figshare.com/ndownloader/files/26316205)

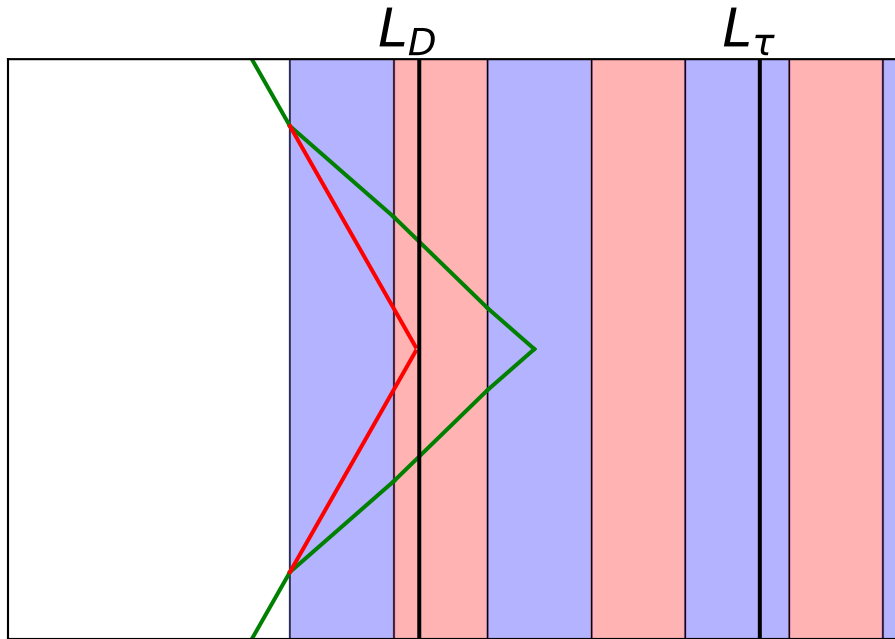

Supplement: Supplementary file 1 [file 26316205]

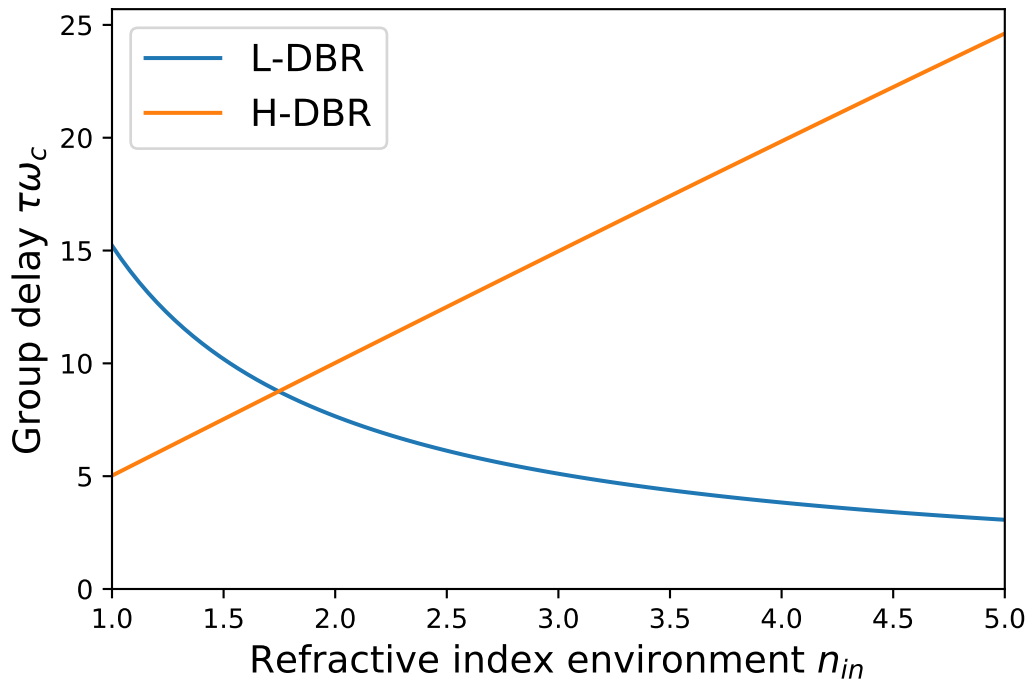

Supplement: Supplementary file 2 [file 26316205]
